# Supplementary material for: Validation of satellite formaldehyde (HCHO) retrievals using observations from 12 aircraft campaigns
Source: Copernicus journal article supplement (doi:10.5194/acp-2019-1117), 2020-01-13
Supplement: Supplementary file [file acp-2019-1117-AC1-supplement.zip]

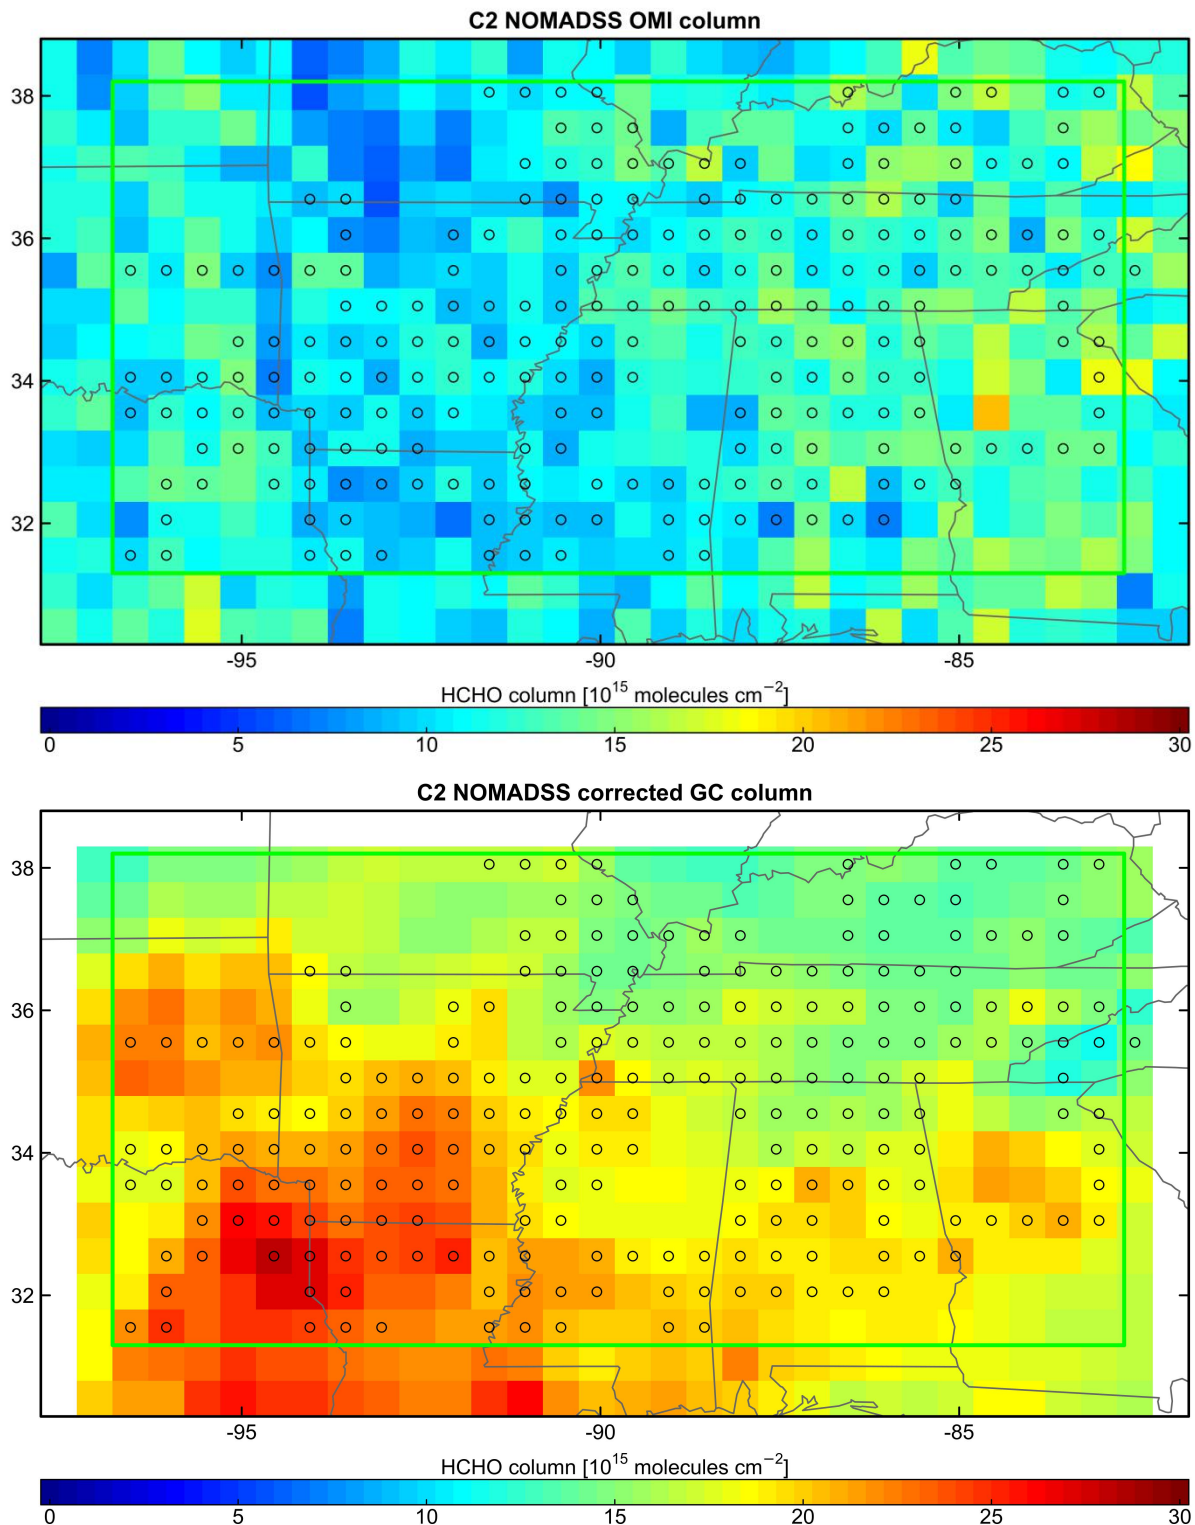

**Figure S1.** HCHO vertical column densities over the NOMADSS aircraft campaign (C2). The upper panel shows data from OMI SAO HCHO product. The bottom panel shows GEOS-Chem model results sampled according to OMI's schedule (see text), and scaled to correct for the bias relative to aircraft measurements (Figure 3). OMI and GEOS-Chem results are regridded onto the  $0.5^\circ \times 0.5^\circ$  grids. The green rectangles represent the study domain (as shown in Figure 1), which is also defined in Table 1. Grids marked with black open circles are sampled by the aircraft (*i.e.*, intercepted with flight tracks in Figure 1).

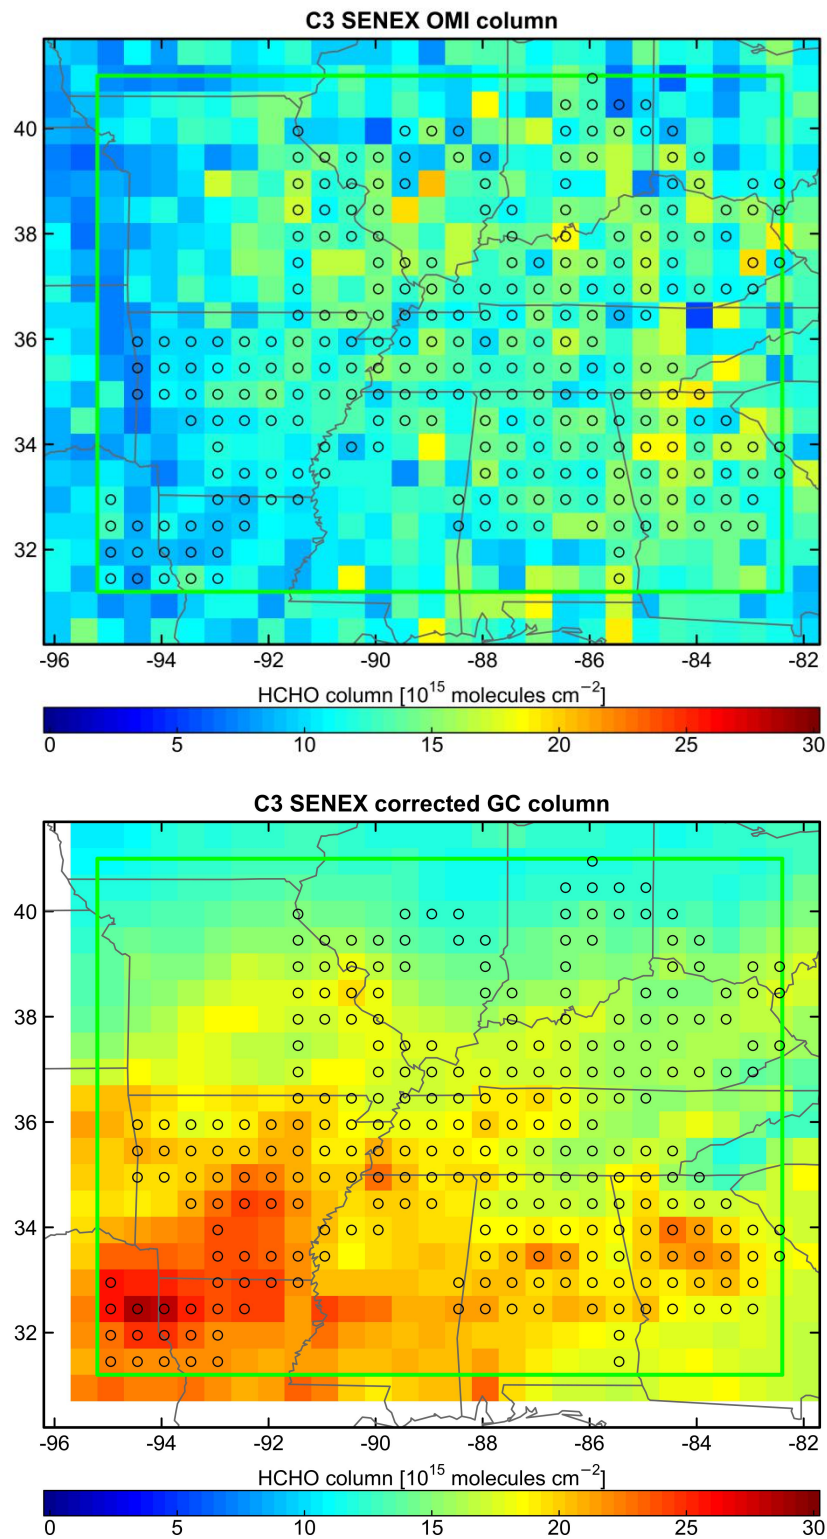

**Figure S2.** Same as Figure S1, but for the SENEX aircraft campaign (C3).

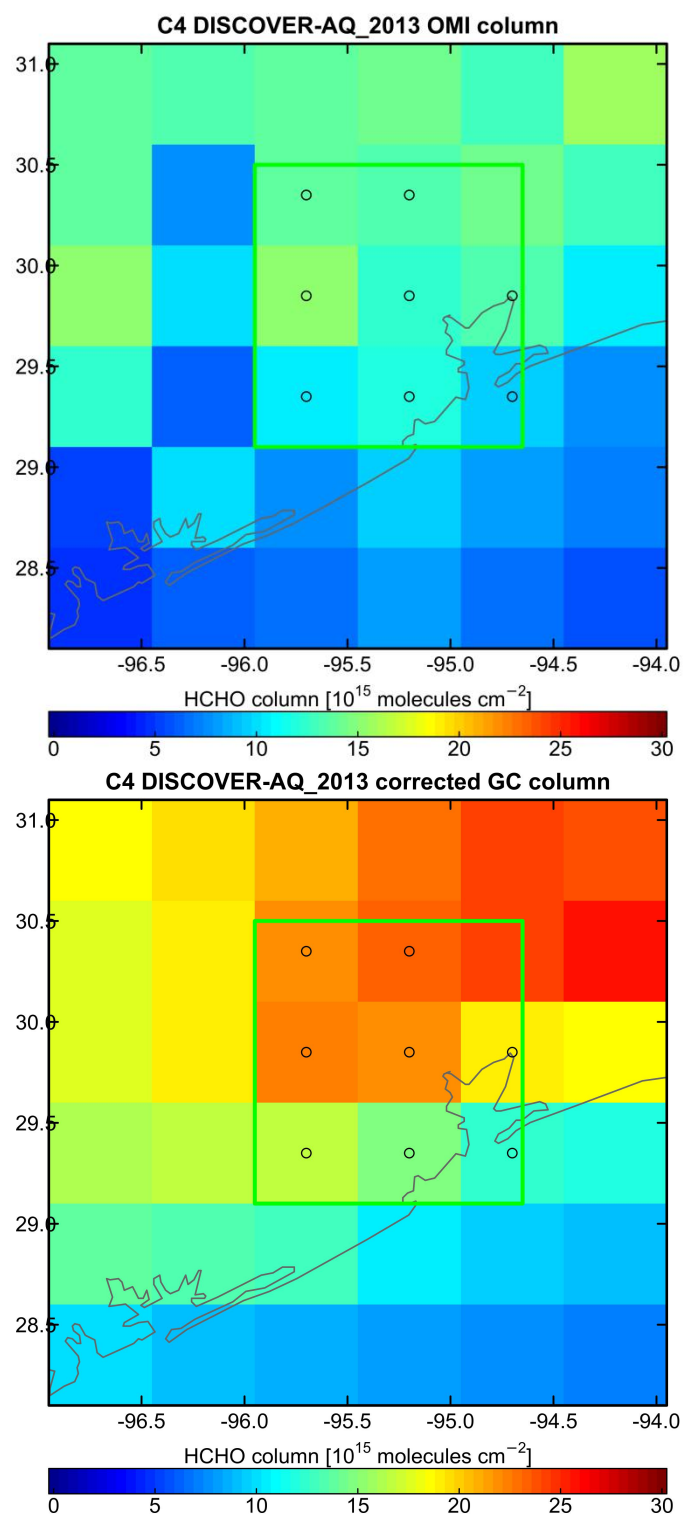

**Figure S3.** Same as Figure S1, but for the DISCOVER-AQ Texas 2013 aircraft campaign (C4).

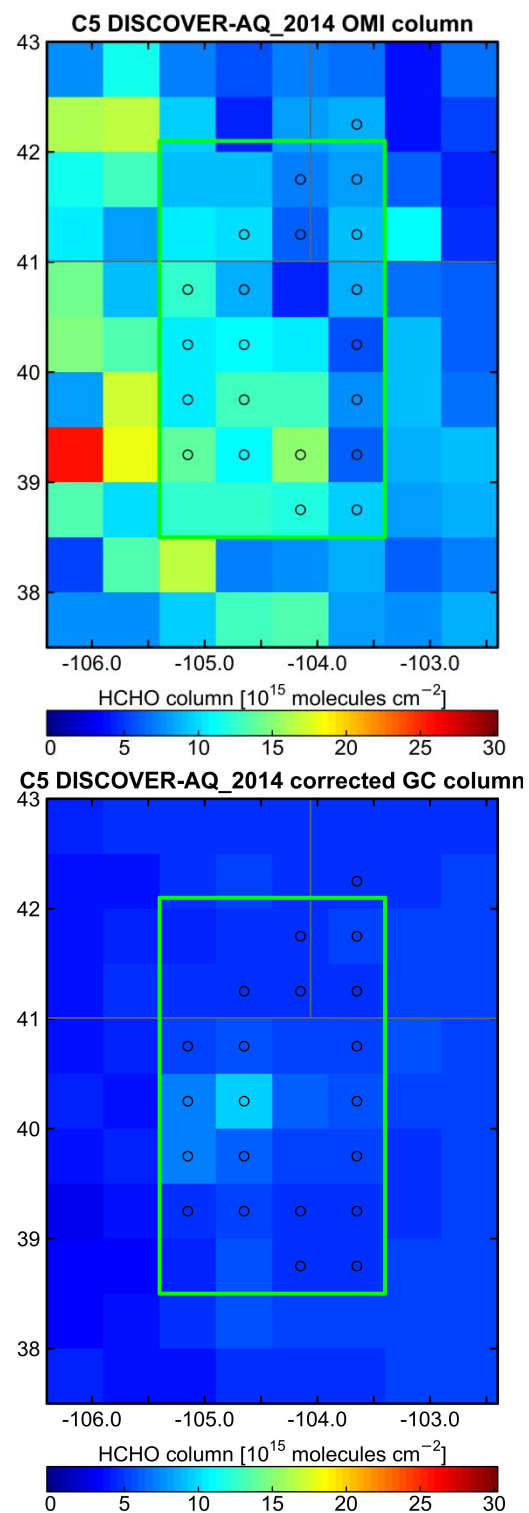

**Figure S4.** Same as Figure S1, but for the DISCOVER-AQ Colorado 2014 aircraft campaign (C5).

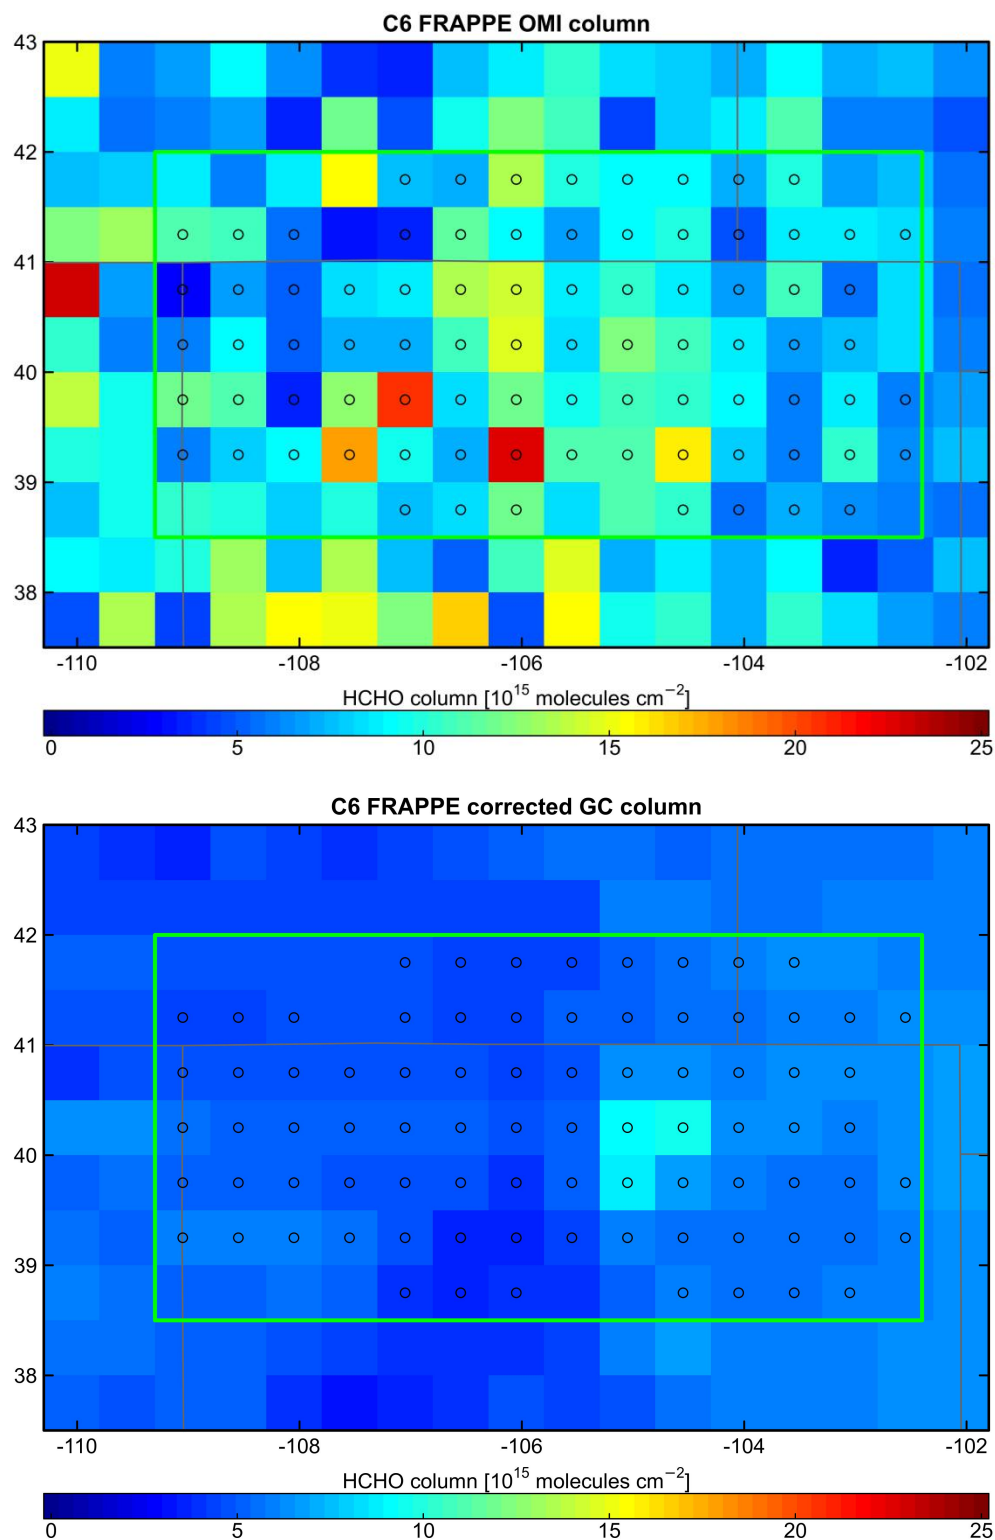

**Figure S5.** Same as Figure S1, but for the FRAPPÉ aircraft campaign (C6).

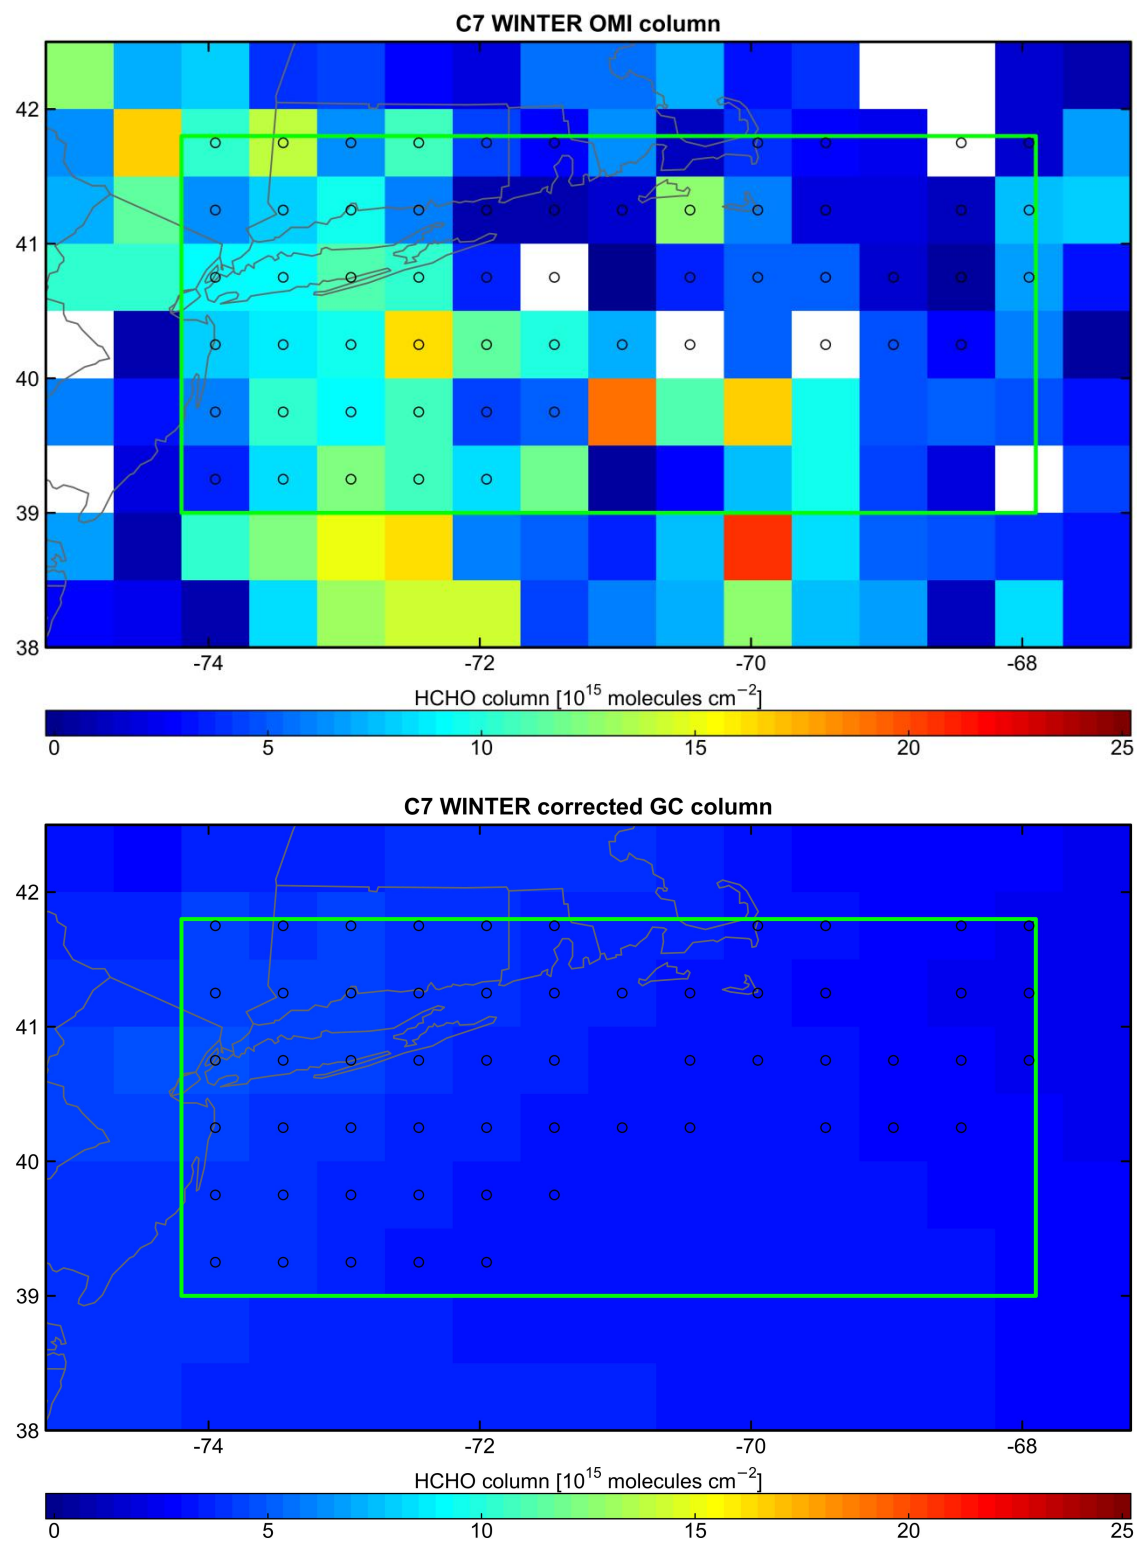

**Figure S6.** Same as Figure S1, but for the WINTER aircraft campaign (C7).



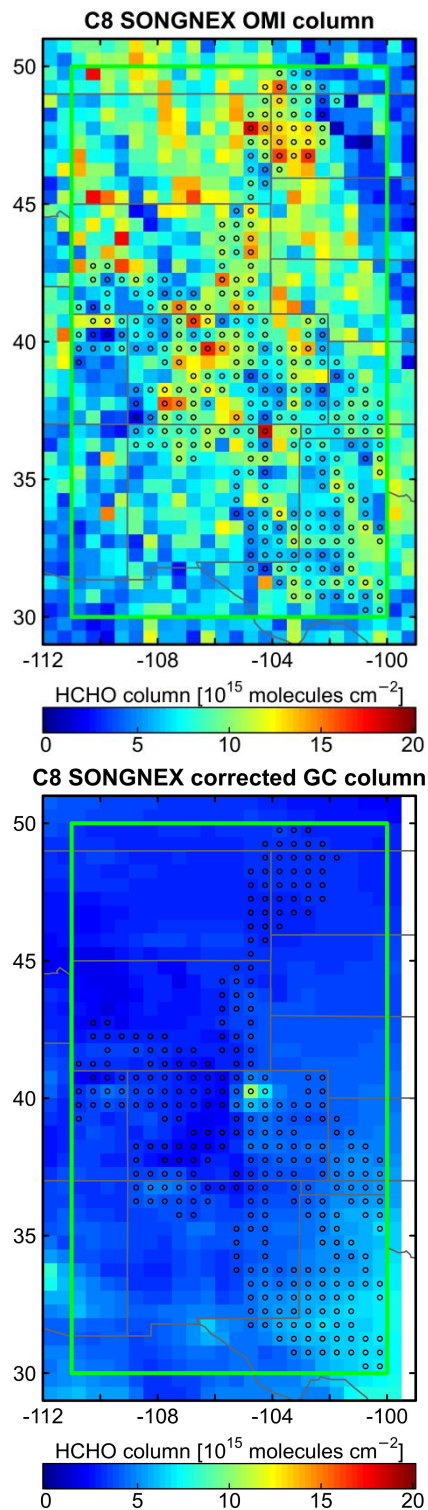

**Figure S7.** Same as Figure S1, but for the SONGNEX aircraft campaign (C8).

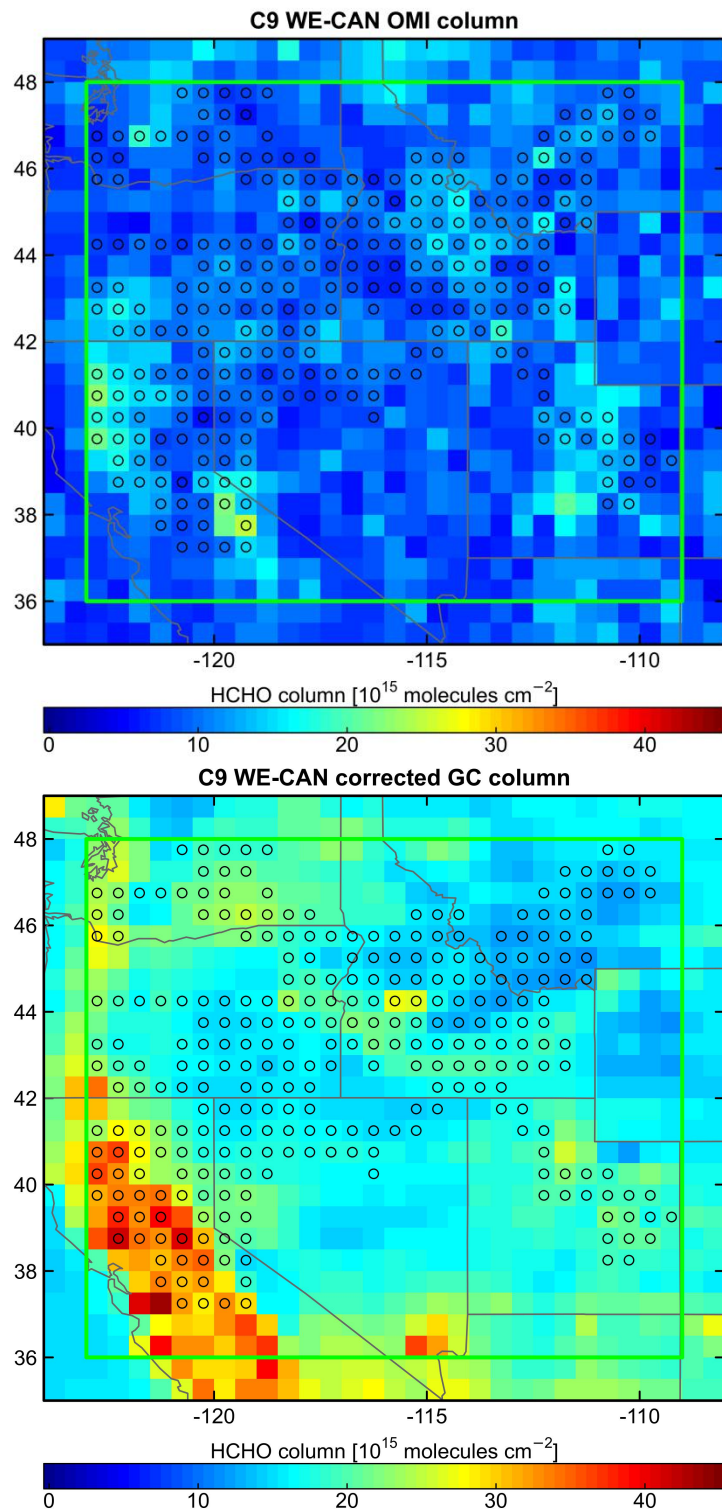

**Figure S8.** Same as Figure S1, but for the WE-CAN aircraft campaign (C9).



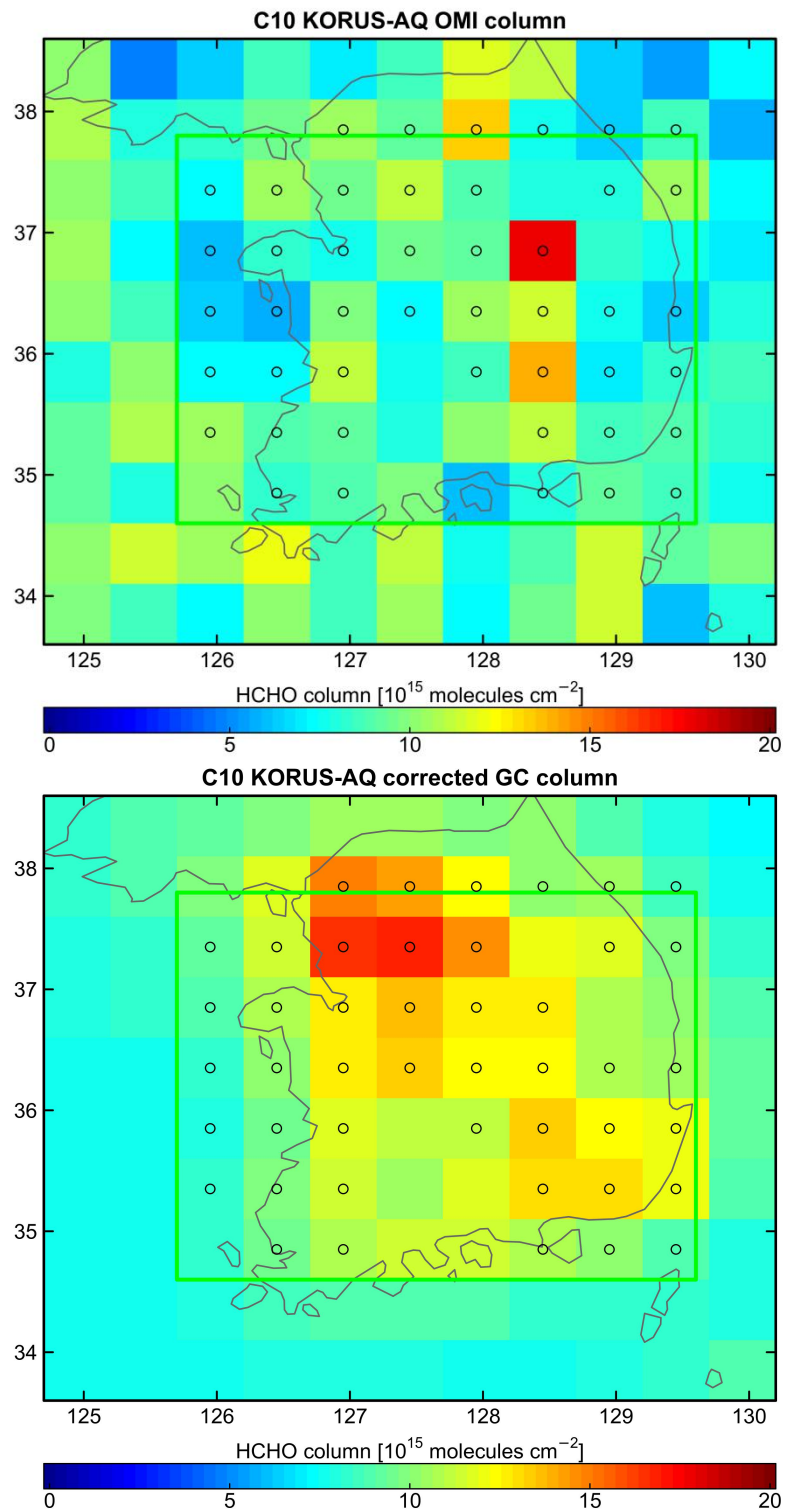

**Figure S9.** Same as Figure S1, but for the KORUS-AQ aircraft campaign (C10).

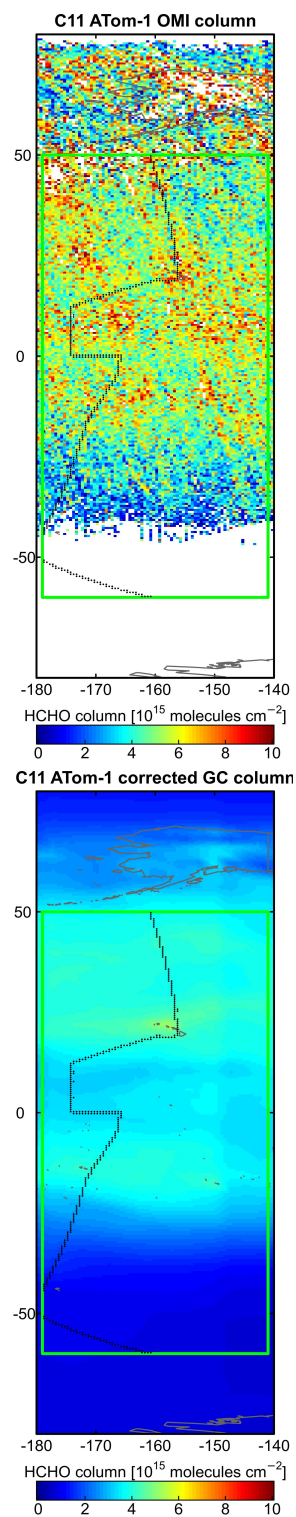

**Figure S10.** Same as Figure S1, but for the ATom-1 aircraft campaign (C11).

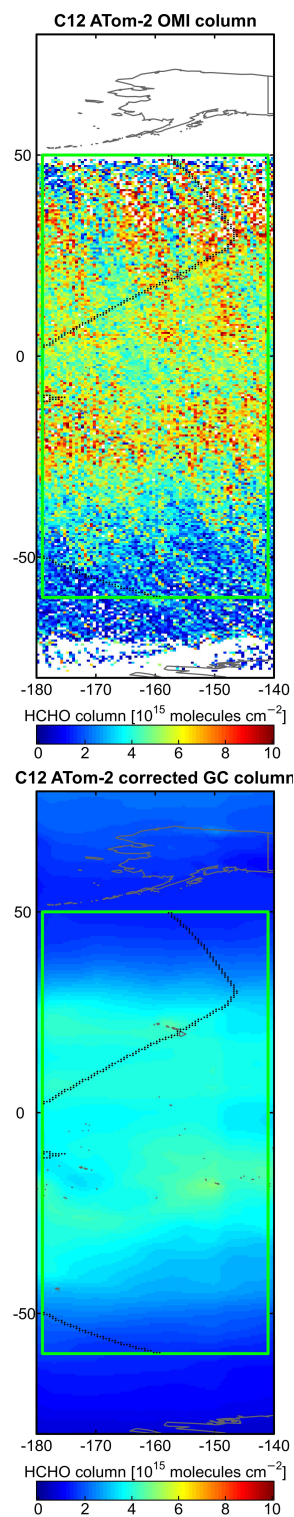

**Figure S11.** Same as Figure S1, but for the ATom-2 aircraft campaign (C12).
